# Supplementary material
Source: publisher site journal article supplement (https://www.dovepress.com/get_supplementary_file.php?f=506663.docx)
Supplement: Supplementary file 1 [file get_supplementary_file.php]

**Title: Effect of Machine Learning on Risk Stratification for Antiretroviral Treatment Failure in People Living with HIV**

**Supplementary information**

**Supplementary methods**

**1.Hematological Parameters (WBC, PLT, HB):**

Peripheral blood samples were collected and processed within 6 hours of collection. Blood samples were centrifuged at 1800 rpm for 5 minutes at room temperature to separate plasma from cellular components. The plasma was carefully aspirated using sterile Pasteur /’; m/pipettes. The remaining cellular fraction was washed twice with phosphate-buffered saline (PBS) to remove residual plasma components. Final cell counts were determined using an automated hematology analyzer (Sysmex XN-1000, Japan).

**2. Biochemical Parameters (ALT, AST, Scr, FBG, TG, TBIL, TC):**

Venous blood samples were collected in EDTA-anticoagulant tubes, with an additional 5 mL collected in plain tubes for serum separation. Serum was obtained by centrifugation at 3000 rpm for 10 minutes at 4°C. Biochemical analyses were performed using the Beckman Coulter Chemistry Analyzer AU5800 Series (Beckman-Coulter, Inc., USA) following the manufacturer's protocols. Quality control measures were implemented using standard reference materials provided by the manufacturer.

**3. CD4+ T-cell Count Quantification:**

Whole blood samples were aliquoted into sterile flow cytometry tubes and stained with fluorochrome-conjugated monoclonal antibodies (BD Multitest™ CD3/CD8/CD45/CD4, BD Biosciences, USA) according to the manufacturer's instructions. Following a 15-minute incubation at room temperature in the dark, red blood cells were lysed using BD FACS Lysing Solution (BD Biosciences, USA). Samples were washed twice with PBS and analyzed using a BD FACSCanto II flow cytometer (BD Biosciences, USA). Data analysis was performed using FACSDiva software (version 8.0.1, BD Biosciences).

**4. Viral Load Quantification:**

HIV-1 viral load testing was performed using the COBAS AmpliPrep/COBAS TaqMan HIV-1 Test, v2.0 (Roche Molecular Systems, USA). Frozen plasma samples were thawed at room temperature and processed according to the manufacturer's protocol. The automated system performed nucleic acid extraction, reverse transcription, amplification, and detection using real-time PCR technology. The assay has a dynamic range of 20 to 10,000,000 copies/mL. Quality control was maintained using the COBAS AmpliPrep/COBAS TaqMan HIV-1 Control Kit (Roche Molecular Systems, USA). All procedures were conducted in a biosafety level 2 laboratory following standard operating protocols for molecular diagnostics.

**Supplementary Table 1. Detailed comparison of the baseline characteristic between the three groups.**

| Variables, n(%) | Total | Training set (T) | Internal validation set (IV) | External validation set (EV) | P for overall | P for EV vs IV | P for EV vs T | P for IV vs T |
| --- | --- | --- | --- | --- | --- | --- | --- | --- |
|  | (n = 9879) | (n = 5189) | (n = 2228) | (n = 2462) |  |  |  |  |
| Age, year | 35.0 (26.0, 51.0) | 32.0 (25.0, 48.0) | 32.0 (25.0, 46.2) | 46.0 (30.0, 56.0) | <0.001 | <0.001 | <0.001 | 0.242 |
| Sex |  |  |  |  | <0.001 | <0.001 | <0.001 | 0.751 |
| Female | 1243 (12.6%) | 496 (9.56%) | 207 (9.29%) | 540 (21.9%) |  |  |  |  |
| Male | 8636 (87.4%) | 4693 (90.4%) | 2021 (90.7%) | 1922 (78.1%) |  |  |  |  |
| BMI, kg/m2 | 21.3 (19.5, 23.4) | 21.3 (19.5, 23.4) | 21.3 (19.4, 23.4) | 21.3 (19.6, 23.3) | 0.608 | 0.588 | 0.588 | 0.588 |
| Infection routes |  |  |  |  | <0.001 | <0.001 | <0.001 | 0.626 |
| Heterosexual | 3867 (39.1%) | 1629 (31.4%) | 686 (30.8%) | 1552 (63.0%) |  |  |  |  |
| Homosexual | 5746 (58.2%) | 3447 (66.4%) | 1491 (66.9%) | 808 (32.8%) |  |  |  |  |
| Injection | 103 (1.04%) | 64 (1.23%) | 33 (1.48%) | 6 (0.24%) |  |  |  |  |
| WHO clinical stage |  |  |  |  | <0.001 | <0.001 | <0.001 | 0.917 |
| 1 and 2 | 7308 (74.0%) | 3697 (71.2%) | 1584 (71.1%) | 2027 (82.3%) |  |  |  |  |
| 3 and 4 | 2571 (26.0%) | 1492 (28.8%) | 644 (28.9%) | 435 (17.7%) |  |  |  |  |
| ART delay, month | 1.10 (0.50, 2.80) | 1.30 (0.80, 3.00) | 1.30 (0.80, 3.00) | 0.00 (0.00, 2.00) | <0.001 | <0.001 | <0.001 | 0.797 |
| Adherence |  |  |  |  | <0.001 | <0.001 | <0.001 | 0.52 |
| Good | 9235 (93.5%) | 4819 (92.9%) | 2059 (92.4%) | 2357 (95.7%) |  |  |  |  |
| Poor | 644 (6.52%) | 370 (7.13%) | 169 (7.59%) | 105 (4.26%) |  |  |  |  |
| Discontinue (stop) ART |  |  |  |  | <0.001 | <0.001 | <0.001 | 0.789 |
| No | 9638 (97.6%) | 5127 (98.8%) | 2199 (98.7%) | 2312 (93.9%) |  |  |  |  |
| Yes | 241 (2.44%) | 62 (1.19%) | 29 (1.30%) | 150 (6.09%) |  |  |  |  |
| Side effects |  |  |  |  | 0.73 | 0.774 | 0.774 | 0.774 |
| No | 9710 (98.3%) | 5101 (98.3%) | 2193 (98.4%) | 2416 (98.1%) |  |  |  |  |
| Yes | 169 (1.71%) | 88 (1.70%) | 35 (1.57%) | 46 (1.87%) |  |  |  |  |
| Firstline ART |  |  |  |  | <0.001 | <0.001 | <0.001 | 0.383 |
| No | 810 (8.20%) | 489 (9.42%) | 195 (8.75%) | 126 (5.12%) |  |  |  |  |
| Yes | 9069 (91.8%) | 4700 (90.6%) | 2033 (91.2%) | 2336 (94.9%) |  |  |  |  |
| NVP based ART |  |  |  |  | <0.001 | <0.001 | <0.001 | 0.93 |
| No | 8778 (88.9%) | 4473 (86.2%) | 1923 (86.3%) | 2382 (96.8%) |  |  |  |  |
| Yes | 1101 (11.1%) | 716 (13.8%) | 305 (13.7%) | 80 (3.25%) |  |  |  |  |
| Skin Damage |  |  |  |  | <0.001 | <0.001 | <0.001 | 0.39 |
| No | 9334 (94.5%) | 4850 (93.5%) | 2095 (94.0%) | 2389 (97.0%) |  |  |  |  |
| Yes | 545 (5.52%) | 339 (6.53%) | 133 (5.97%) | 73 (2.97%) |  |  |  |  |
| Thrush |  |  |  |  | <0.001 | 0.001 | <0.001 | 0.04 |
| No | 9598 (97.2%) | 4999 (96.3%) | 2168 (97.3%) | 2431 (98.7%) |  |  |  |  |
| Yes | 281 (2.84%) | 190 (3.66%) | 60 (2.69%) | 31 (1.26%) |  |  |  |  |
| White Spots |  |  |  |  | 0.428 | 0.873 | 0.756 | 0.756 |
| No | 9806 (99.3%) | 5156 (99.4%) | 2210 (99.2%) | 2440 (99.1%) |  |  |  |  |
| Yes | 73 (0.74%) | 33 (0.64%) | 18 (0.81%) | 22 (0.89%) |  |  |  |  |
| Fever≥1month |  |  |  |  | <0.001 | <0.001 | <0.001 | 0.067 |
| No | 9318 (94.3%) | 4832 (93.1%) | 2101 (94.3%) | 2385 (96.9%) |  |  |  |  |
| Yes | 561 (5.68%) | 357 (6.88%) | 127 (5.70%) | 77 (3.13%) |  |  |  |  |
| Diarrhea≥1month |  |  |  |  | <0.001 | <0.001 | <0.001 | 0.907 |
| No | 9546 (96.6%) | 4970 (95.8%) | 2136 (95.9%) | 2440 (99.1%) |  |  |  |  |
| Yes | 333 (3.37%) | 219 (4.22%) | 92 (4.13%) | 22 (0.89%) |  |  |  |  |
| Bacterial Pneumonia |  |  |  |  | <0.001 | <0.001 | <0.001 | 0.417 |
| No | 9781 (99.0%) | 5128 (98.8%) | 2196 (98.6%) | 2457 (99.8%) |  |  |  |  |
| Yes | 98 (0.99%) | 61 (1.18%) | 32 (1.44%) | 5 (0.20%) |  |  |  |  |
| Bacterial Infections Except Pneumonia |  |  |  |  | <0.001 | <0.001 | <0.001 | 0.221 |
| No | 9751 (98.7%) | 5097 (98.2%) | 2198 (98.7%) | 2456 (99.8%) |  |  |  |  |
| Yes | 128 (1.30%) | 92 (1.77%) | 30 (1.35%) | 6 (0.24%) |  |  |  |  |
| PTB |  |  |  |  | 0.051 | 0.511 | 0.119 | 0.511 |
| No | 9873 (99.9%) | 5188 (100.0%) | 2227 (100.0%) | 2458 (99.8%) |  |  |  |  |
| Yes | 6 (0.06%) | 1 (0.02%) | 1 (0.04%) | 4 (0.16%) |  |  |  |  |
| Herpes Simplex Virus |  |  |  |  | 0.835 | 1 | 1 | 1 |
| No | 9859 (99.8%) | 5179 (99.8%) | 2224 (99.8%) | 2456 (99.8%) |  |  |  |  |
| Yes | 20 (0.20%) | 10 (0.19%) | 4 (0.18%) | 6 (0.24%) |  |  |  |  |
| Herpes Zoster |  |  |  |  | <0.001 | 0.096 | <0.001 | 0.096 |
| No | 9616 (97.3%) | 5022 (96.8%) | 2173 (97.5%) | 2421 (98.3%) |  |  |  |  |
| Yes | 263 (2.66%) | 167 (3.22%) | 55 (2.47%) | 41 (1.67%) |  |  |  |  |
| Toxoplasmosis |  |  |  |  | 0.539 | 0.898 | 0.898 | 1 |
| No | 9875 (100.0%) | 5187 (100.0%) | 2228 (100%) | 2460 (99.9%) |  |  |  |  |
| Yes | 4 (0.04%) | 2 (0.04%) | 0 (0.00%) | 2 (0.08%) |  |  |  |  |
| PCP |  |  |  |  | 0.001 | 0.124 | 0.001 | 0.208 |
| No | 9621 (97.4%) | 5078 (97.9%) | 2169 (97.4%) | 2374 (96.4%) |  |  |  |  |
| Yes | 258 (2.61%) | 111 (2.14%) | 59 (2.65%) | 88 (3.57%) |  |  |  |  |
| Disseminated NTM |  |  |  |  | 0.231 | 0.325 | 0.431 | 0.548 |
| No | 9865 (99.9%) | 5181 (99.8%) | 2223 (99.8%) | 2461 (100.0%) |  |  |  |  |
| Yes | 14 (0.14%) | 8 (0.15%) | 5 (0.22%) | 1 (0.04%) |  |  |  |  |
| Kaposi sarcoma |  |  |  |  | 0.888 | 1 | 1 | 1 |
| No | 9872 (99.9%) | 5185 (99.9%) | 2226 (99.9%) | 2461 (100.0%) |  |  |  |  |
| Yes | 7 (0.07%) | 4 (0.08%) | 2 (0.09%) | 1 (0.04%) |  |  |  |  |
| Cough |  |  |  |  | <0.001 | <0.001 | <0.001 | 0.501 |
| No | 9001 (91.1%) | 4641 (89.4%) | 2005 (90.0%) | 2355 (95.7%) |  |  |  |  |
| Yes | 878 (8.89%) | 548 (10.6%) | 223 (10.0%) | 107 (4.35%) |  |  |  |  |
| Sputum |  |  |  |  | <0.001 | <0.001 | <0.001 | 0.172 |
| No | 9547 (96.6%) | 4973 (95.8%) | 2151 (96.5%) | 2423 (98.4%) |  |  |  |  |
| Yes | 332 (3.36%) | 216 (4.16%) | 77 (3.46%) | 39 (1.58%) |  |  |  |  |
| Dyspnea |  |  |  |  | 0.428 | 0.523 | 0.747 | 0.523 |
| No | 9705 (98.2%) | 5100 (98.3%) | 2182 (97.9%) | 2423 (98.4%) |  |  |  |  |
| Yes | 174 (1.76%) | 89 (1.72%) | 46 (2.06%) | 39 (1.58%) |  |  |  |  |
| Chest Pain |  |  |  |  | <0.001 | <0.001 | <0.001 | 0.678 |
| No | 9750 (98.7%) | 5109 (98.5%) | 2190 (98.3%) | 2451 (99.6%) |  |  |  |  |
| Yes | 129 (1.31%) | 80 (1.54%) | 38 (1.71%) | 11 (0.45%) |  |  |  |  |
| Night sweats |  |  |  |  | <0.001 | <0.001 | <0.001 | 0.828 |
| No | 9389 (95.0%) | 4859 (93.6%) | 2090 (93.8%) | 2440 (99.1%) |  |  |  |  |
| Yes | 490 (4.96%) | 330 (6.36%) | 138 (6.19%) | 22 (0.89%) |  |  |  |  |
| Nauseating |  |  |  |  | <0.001 | <0.001 | <0.001 | 0.26 |
| No | 9763 (98.8%) | 5104 (98.4%) | 2200 (98.7%) | 2459 (99.9%) |  |  |  |  |
| Yes | 116 (1.17%) | 85 (1.64%) | 28 (1.26%) | 3 (0.12%) |  |  |  |  |
| Projectile Vomiting |  |  |  |  | 0.155 | 0.161 | 0.161 | 1 |
| No | 9869 (99.9%) | 5182 (99.9%) | 2225 (99.9%) | 2462 (100%) |  |  |  |  |
| Yes | 10 (0.10%) | 7 (0.13%) | 3 (0.13%) | 0 (0.00%) |  |  |  |  |
| Headaches |  |  |  |  | <0.001 | 0.004 | <0.001 | 0.51 |
| No | 9730 (98.5%) | 5092 (98.1%) | 2192 (98.4%) | 2446 (99.4%) |  |  |  |  |
| Yes | 149 (1.51%) | 97 (1.87%) | 36 (1.62%) | 16 (0.65%) |  |  |  |  |
| Vision Loss |  |  |  |  | 0.003 | 0.007 | 0.003 | 0.956 |
| No | 9780 (99.0%) | 5126 (98.8%) | 2202 (98.8%) | 2452 (99.6%) |  |  |  |  |
| Yes | 99 (1.00%) | 63 (1.21%) | 26 (1.17%) | 10 (0.41%) |  |  |  |  |
| Blur |  |  |  |  | <0.001 | 0.002 | <0.001 | 0.448 |
| No | 9792 (99.1%) | 5128 (98.8%) | 2207 (99.1%) | 2457 (99.8%) |  |  |  |  |
| Yes | 87 (0.88%) | 61 (1.18%) | 21 (0.94%) | 5 (0.20%) |  |  |  |  |
| Rash |  |  |  |  | <0.001 | <0.001 | <0.001 | 0.104 |
| No | 9427 (95.4%) | 4892 (94.3%) | 2122 (95.2%) | 2413 (98.0%) |  |  |  |  |
| Yes | 452 (4.58%) | 297 (5.72%) | 106 (4.76%) | 49 (1.99%) |  |  |  |  |
| CD4+ T-cell counts |  |  |  |  | <0.001 | <0.001 | <0.001 | 0.536 |
| <324 cells/μL | 4075 (41.2%) | 2194 (42.3%) | 960 (43.1%) | 921 (37.4%) |  |  |  |  |
| ≥324 cells/μL | 5804 (58.8%) | 2995 (57.7%) | 1268 (56.9%) | 1541 (62.6%) |  |  |  |  |
| Scr, μmol/L | 68.0 (58.0, 77.9) | 68.0 (58.0, 77.0) | 68.0 (57.2, 77.7) | 69.0 (59.1, 79.4) | <0.001 | <0.001 | <0.001 | 0.571 |
| TG, mmol/L | 1.46 (0.97, 2.21) | 1.50 (0.99, 2.32) | 1.50 (0.96, 2.24) | 1.38 (0.94, 1.99) | <0.001 | <0.001 | <0.001 | 0.147 |
| AST, U/L | 25.0 (19.0, 32.0) | 24.0 (18.0, 31.0) | 24.0 (18.0, 31.0) | 28.0 (22.0, 35.8) | <0.001 | <0.001 | <0.001 | 0.859 |
| TBIL, mol/L | 8.30 (6.20, 11.8) | 8.30 (6.10, 11.9) | 8.20 (5.80, 11.9) | 8.60 (6.60, 11.4) | <0.001 | <0.001 | <0.001 | 0.296 |
| WBCcells/μL | 5.46 (4.52, 6.58) | 5.51 (4.56, 6.60) | 5.48 (4.56, 6.61) | 5.35 (4.39, 6.45) | <0.001 | 0.007 | <0.001 | 0.533 |
| PLT, 10^9/L | 205 (153, 251) | 211 (148, 253) | 212 (144, 252) | 201 (162, 242) | 0.573 | 0.642 | 0.642 | 0.642 |
| HB, g/L | 147 (132, 157) | 147 (132, 157) | 147 (134, 157) | 146 (131, 157) | 0.731 | 0.704 | 0.704 | 0.704 |
| TC, mmol/L | 4.30 (3.70, 4.89) | 4.30 (3.70, 4.90) | 4.30 (3.69, 4.84) | 4.30 (3.68, 4.93) | 0.356 | 0.868 | 0.46 | 0.46 |
| FBG, mmol/L | 5.57 (5.11, 6.10) | 5.60 (5.20, 6.20) | 5.60 (5.20, 6.20) | 5.41 (4.90, 5.94) | <0.001 | <0.001 | <0.001 | 0.842 |
| ALT, U/L | 24.0 (16.0, 37.0) | 22.0 (14.0, 35.0) | 22.1 (14.0, 35.0) | 28.0 (20.0, 42.0) | <0.001 | <0.001 | <0.001 | 0.929 |

**Notes**: **BMI**, body mass index, **NVP**, nevirapine; **PTB**, pulmonary tuberculosis; **PCP**, pneumocystis carinii pneumonia; **NTM**, non-tuberculous mycobacteria; **VL**, viral load; **Scr**, serum creatinine; **TG**, triglyceride; **AST**, artate aminotransferase; **TBIL**, total bilirubin; **WBC**, white blood cell; **PLT**, platelet; **HB**, haemoglobin; **TC**, total cholesterol; **FBG**, fasting blood glucose; **ALT**, alanine aminotransferase; **ART**, antiretroviral therap

**Supplementary table 2. Sensitivity analysis of baseline characteristics before and after exclusion in the train set.**

| **Characteristics** | **Before exclusion** | **After exclusion** | **P value** |
| --- | --- | --- | --- |
| ***N=7094*** | ***N=5189*** |
| BMI, kg/m2, median(IQR) | 21.5 (19.6, 23.4) | 21.3 (19.5, 23.4) | 0.199 |
| CD4, cells/μL, median(IQR) | 366 (176, 547) | 366 (151, 551) | 0.152 |
| WBC, cells/μL, median(IQR) | 5.48 (4.51, 6.58) | 5.52 (4.57, 6.61) | 0.082 |
| PLT, 10^9/L, median(IQR) | 204 (154, 249) | 212 (148, 253) | 0.804 |
| HB, g/L, median(IQR) | 147 (133, 157) | 147 (132, 157) | 0.747 |
| Scr, μmol/L,median(IQR) | 68.0 (58.0, 78.0) | 68.0 (58.0, 77.0) | 0.083 |
| TG, mmol/L, median(IQR) | 1.47 (0.98, 2.25) | 1.50 (0.99, 2.32) | 0.052 |
| TC, mmol/L, median(IQR) | 4.30 (3.70, 4.90) | 4.30 (3.70, 4.90) | 0.609 |
| FBG, mmol/L, median(IQR) | 5.60 (5.20, 6.20) | 5.60 (5.20, 6.20) | 0.762 |
| ALT, U/L, median(IQR) | 22.0 (14.0, 34.0) | 22.0 (14.0, 35.0) | 0.536 |
| AST, U/L, median(IQR) | 24.0 (18.0, 31.0) | 24.0 (18.0, 31.0) | 0.562 |
| TBIL, mol/L, median(IQR) | 8.40 (6.30, 11.7) | 8.30 (6.10, 11.8) | 0.179 |
| ARTdelayM | 1.30 (0.80, 3.10) | 1.30 (0.80, 3.00) | 0.973 |
| Discontinue ART |  |  | 0.480 |
| No | 7020 (99.0%) | 5127 (98.8%) |  |
| Yes | 74 (1.04%) | 62 (1.19%) |  |
| Side effect |  |  | 0.836 |
| No | 6969 (98.2%) | 5101 (98.3%) |  |
| Yes | 125 (1.76%) | 88 (1.70%) |  |
| Adherence |  |  | 0.126 |
| Good | 6639 (93.6%) | 4819 (92.9%) |  |
| Poor | 455 (6.41%) | 370 (7.13%) |  |

**Notes: BMI**, body mass index; **Scr**, serum creatinine; **TG**, triglyceride; **AST**, artate aminotransferase; **TBIL**, total bilirubin; **WBC,** white blood cell; **PLT**, platelet; **HB**, haemoglobin; **TC**, total cholesterol; **FBG**, fasting blood glucose; **ALT**, alanine aminotransferase; **ART**, antiretroviral therapy.

**Supplementary table 3. Sensitivity analysis of characteristics with missing data before and after multiple imputation in the train set.**

| Characteristics | Before MI | After MI | P value |
| --- | --- | --- | --- |
| *N=5059* | *N=5189* |
| BMI | 21.3 (19.5, 23.4) | 21.3 (19.5, 23.4) | 0.933 |
| CD4 | 366 (151, 551) | 367 (151, 552) | 0.819 |
| WBC | 5.52 (4.57, 6.61) | 5.51 (4.56, 6.60) | 0.739 |
| PLT | 212 (148, 253) | 211 (148, 253) | 0.985 |
| HB | 147 (132, 157) | 147 (132, 157) | 0.818 |
| Scr | 68.0 (58.0, 77.0) | 68.0 (58.0, 77.0) | 0.951 |
| TG | 1.50 (0.99, 2.32) | 1.50 (0.99, 2.32) | 0.997 |
| TC | 4.30 (3.70, 4.90) | 4.30 (3.70, 4.90) | 0.937 |
| FBG | 5.60 (5.20, 6.20) | 5.60 (5.20, 6.20) | 0.897 |
| ALT | 22.0 (14.0, 35.0) | 22.0 (14.0, 35.0) | 0.935 |
| AST | 24.0 (18.0, 31.0) | 24.0 (18.0, 31.0) | 0.892 |
| TBIL | 8.30 (6.10, 11.8) | 8.30 (6.10, 11.9) | 0.875 |

**Notes: BMI**, body mass index; **Scr**, serum creatinine; **TG**, triglyceride; **AST**, artate aminotransferase; **TBIL**, total bilirubin; **WBC**, white blood cell; **PLT**, platelet; **HB**, haemoglobin; **TC**, total cholesterol; **FBG**, fasting blood glucose; **ALT**, alanine aminotransferase; **MI**, multiple imputation.

**Supplementary table 4. Categorical variable transformation based on ROC analysis**

| **Variables, n(%)** | **Total (n = 9879)** | **T (n = 5189)** | **IV (n = 2228)** | **EV (n = 2462)** |
| --- | --- | --- | --- | --- |
| ART delay |  |  |  |  |
| ＜2.2months | 6869 (69.53) | 3548 (68.38) | 1520 (68.22) | 1801 (73.15) |
| ≥2.2months | 3010 (30.47) | 1641 (31.62) | 708 (31.78) | 661 (26.85) |
| CD4+ T cell counts |  |  |  |  |
| ≥324/μL | 4075 (41.25) | 2194 (42.28) | 960 (43.09) | 921 (37.41) |
| <324/μL | 5804 (58.75) | 2995 (57.72) | 1268 (56.91) | 1541 (62.59) |
| Age at ART initiation |  |  |  |  |
| <29 years | 5361 (54.27) | 2015 (38.83) | 884 (39.68) | 513 (20.84) |
| ≥29 years | 4518 (45.73) | 3174 (61.17) | 1344 (60.32) | 1949 (79.16) |
| BMI |  |  |  |  |
| <16.5 | 240 (2.43) | 134 (2.58) | 64 (2.87) | 42 (1.71) |
| ≥16.5 | 9639 (97.57) | 5055 (97.42) | 2164 (97.13) | 2420 (98.29) |

**Notes: BMI**, body mass index; **ART**, antiretroviral therapy.

**Supplementary figure 1. the proportion(A) and pattern(B) of missing data in the train dataset.**
